# Supplementary material
Source: publisher figshare collection journal article supplement (https://acs.figshare.com/ndownloader/files/19707059)
Supplement: Supplementary file 1 [file 19707059]

# Temperature-Responsive Supramolecular Hydrogels by Ternary Complex Formation with Subsequent Photo-Crosslinking to Alter Network Dynamics

Lei Zou, Bo Su, Christopher J. Addonizio, Irawan Pramudya, Matthew J. Webber \*

University of Notre Dame, Department of Chemical & Biomolecular Engineering, Notre Dame, IN USA

\*- [mwebber@nd.edu](mailto:mwebber@nd.edu)

## Supporting Data and Characterization

**Figure S1-** Detailed schematic of synthesis

**Figure S2-** Temperature-dependent  $^1\text{H}$ -NMR of F127-BM:CB[8] prior to UV

**Figure S3-** Variable temperature rheology of F127-BM without CB[8]

**Figure S4-** Strain sweep data of F127-BM:CB[8] hydrogels prior to UV

**Figure S5-** Aqueous size-exclusion chromatography before and after UV

**Figure S6-** UV/Vis spectroscopic quantification for reduced equivalents of CB[8]

**Figure S7-** Temperature-dependent  $^1\text{H}$ -NMR of F127-BM:CB[8] following UV

**Figure S8-** Comparative rheology data before and after UV treatment

**Figure S9-** Strain sweep data of F127-BM:CB[8] hydrogels following UV

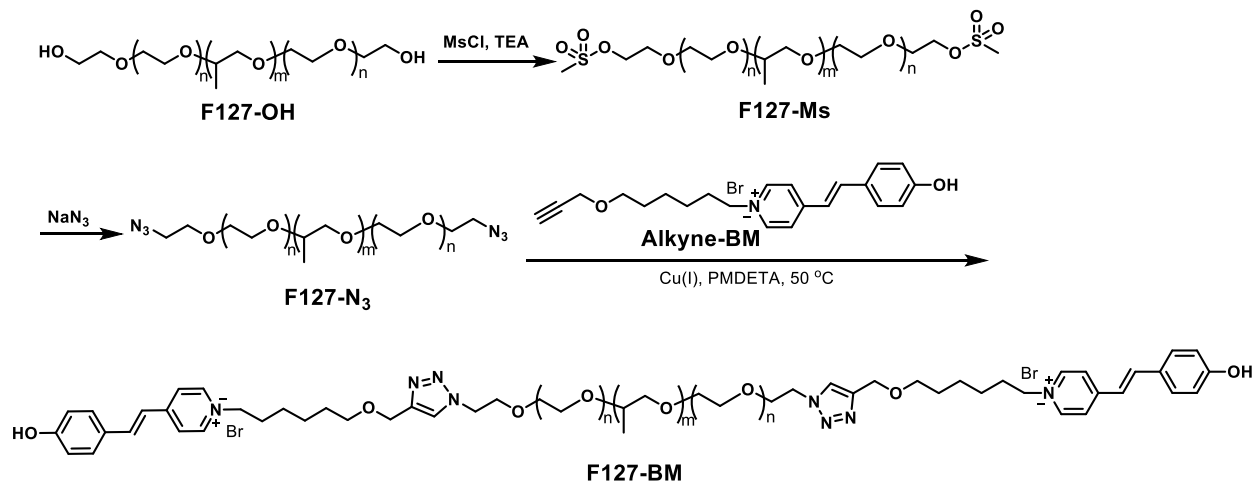

**Figure S1:** Detailed scheme of the reaction to append BM guests on F127 macromers.

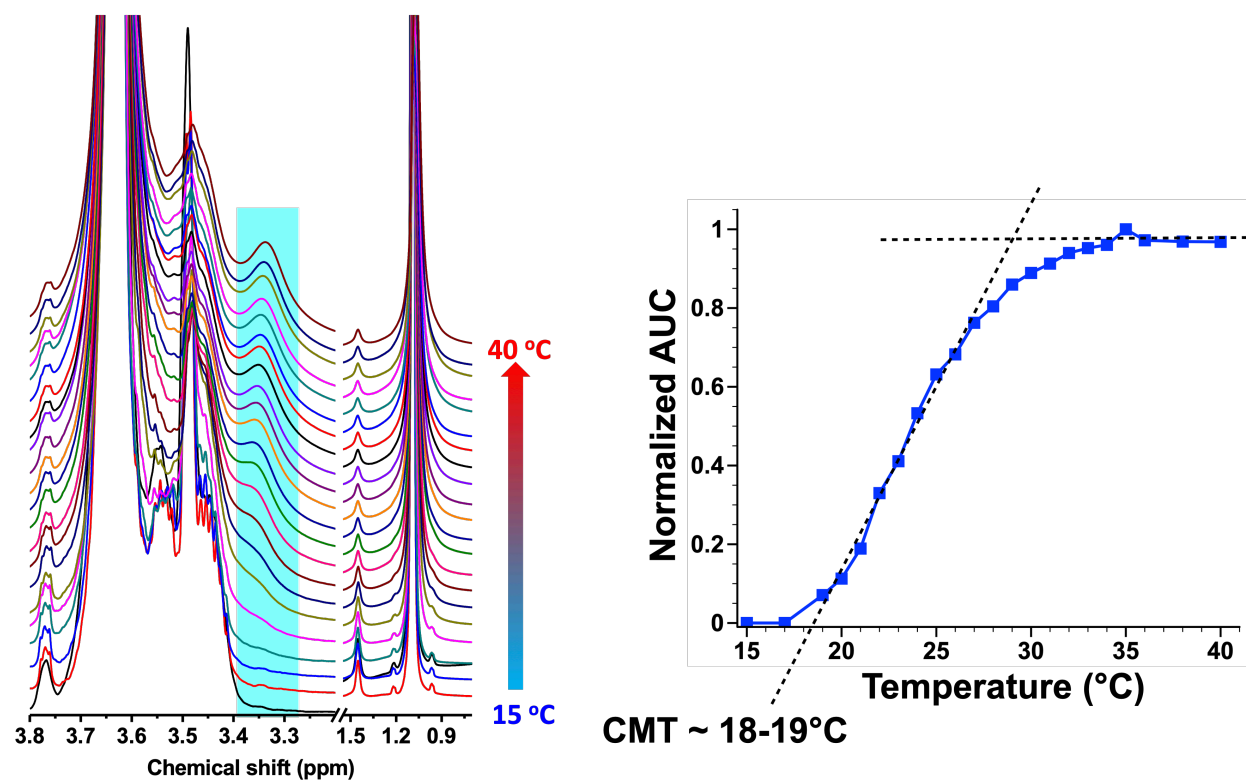

**Figure S2:** Temperature-dependent  $^1\text{H}$ -NMR (left) of F127-BM and one equivalent of CB[8] (1 CB[8] per 2 BM guests), with the area under the curve in the blue-shaded region integrated to estimate the critical micelle concentration (right).

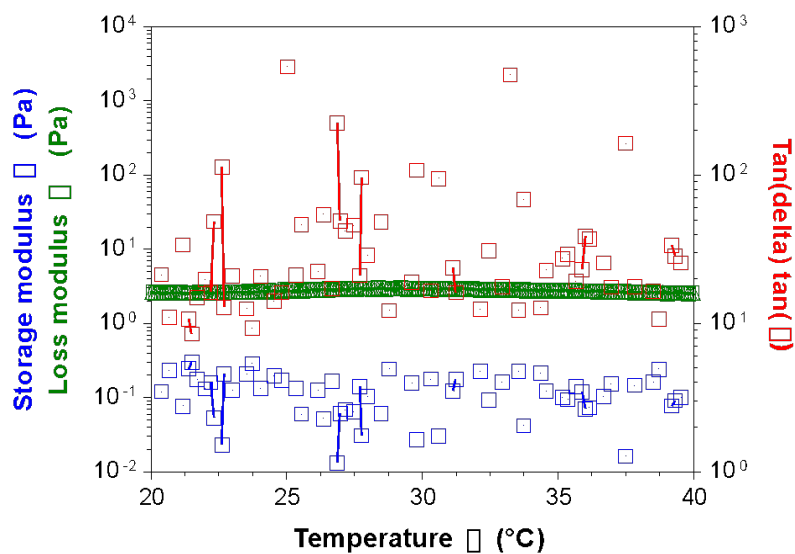

**Figure S3:** Variable temperature oscillatory rheology of F127-BM without CB[8], with no evidence of gelation over the full temperature range.

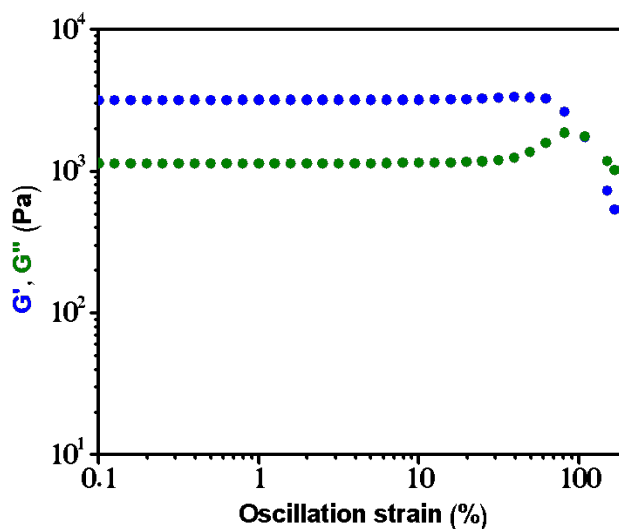

**Figure S4:** Strain sweep measurements of the gel formed by mixing F127-BM with 1 eq. CB[8] at 37 °C from 0.1% to 200% at 100 rad/s frequency to demonstrate the linear viscoelastic region.

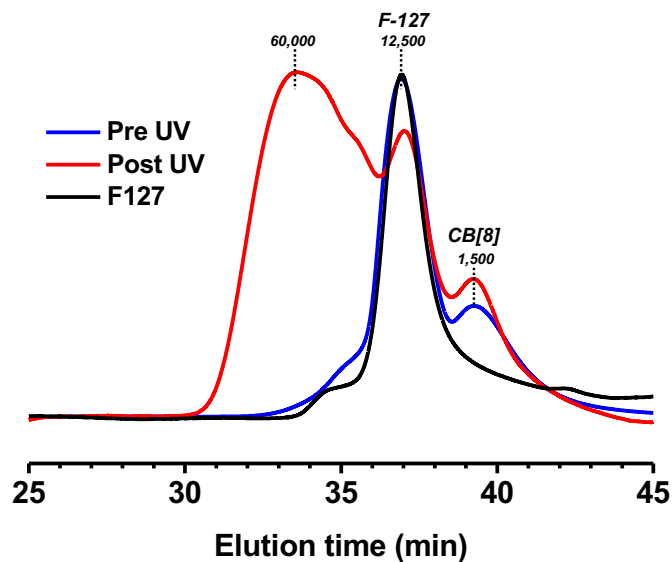

**Figure S5:** Size-exclusion chromatography of F127-BM with and without CB[8], as well as the sample with CB[8] following photodimerization. Masses for each peak were estimated on the basis of fitting to a PEG/PEO standard curve.

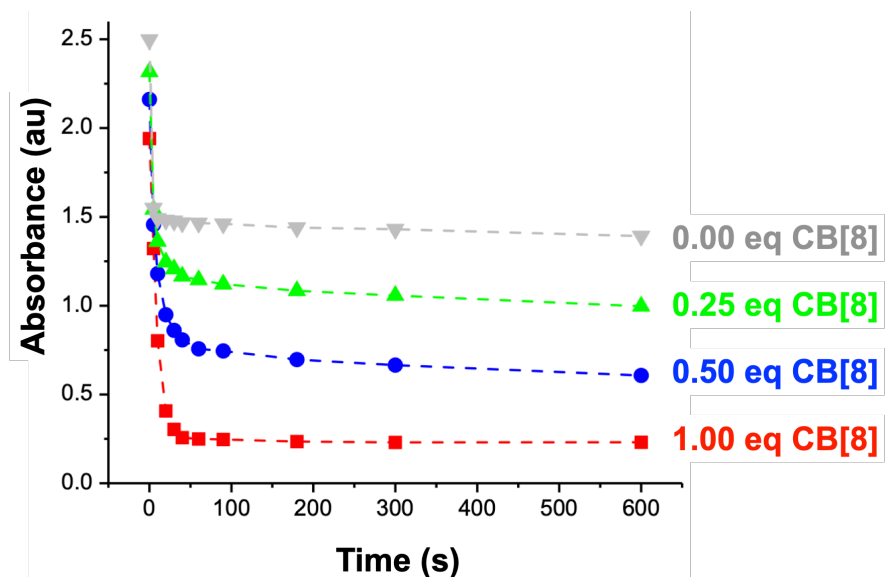

**Figure S6:** Peak intensity from UV/Vis spectroscopy quantifying the 378-nm absorbance signature serially with different irradiation times.

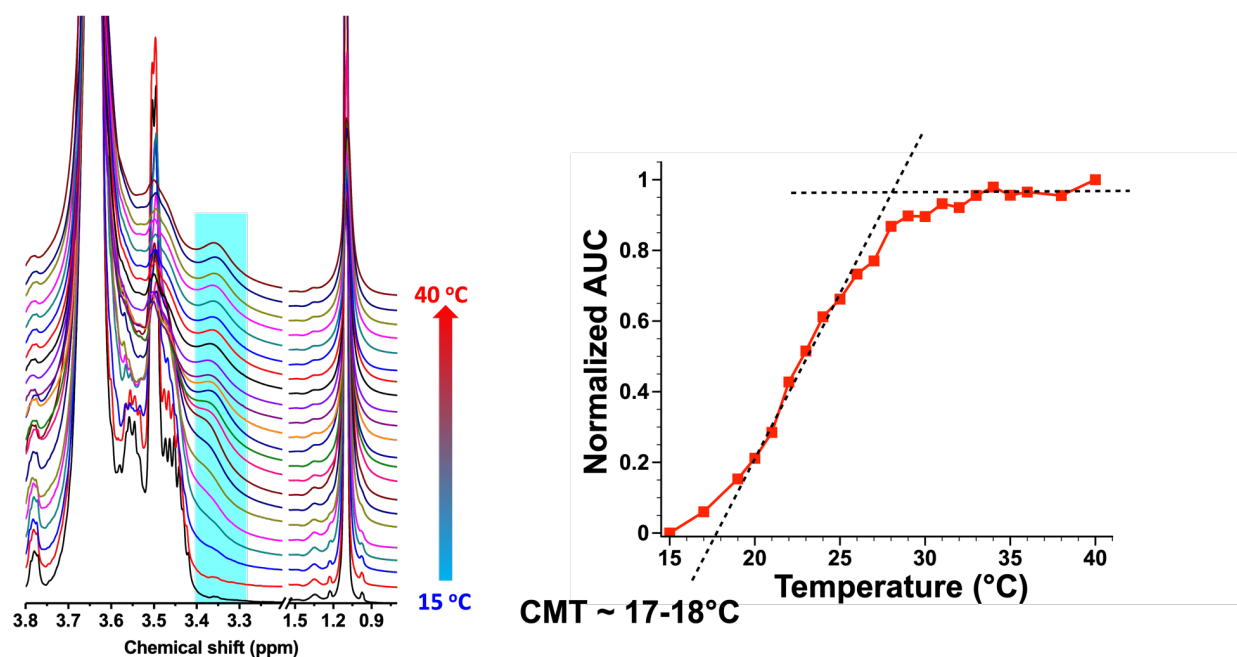

**Figure S7:** Temperature-dependent  $^1\text{H}$ -NMR (left) of F127-BM and one equivalent of CB[8] (1 CB[8] per 2 BM guests) following irradiation of the polymer solution for 6 h with 378 nm light, with the area under the curve in the blue-shaded region integrated to estimate the critical micelle concentration (right).

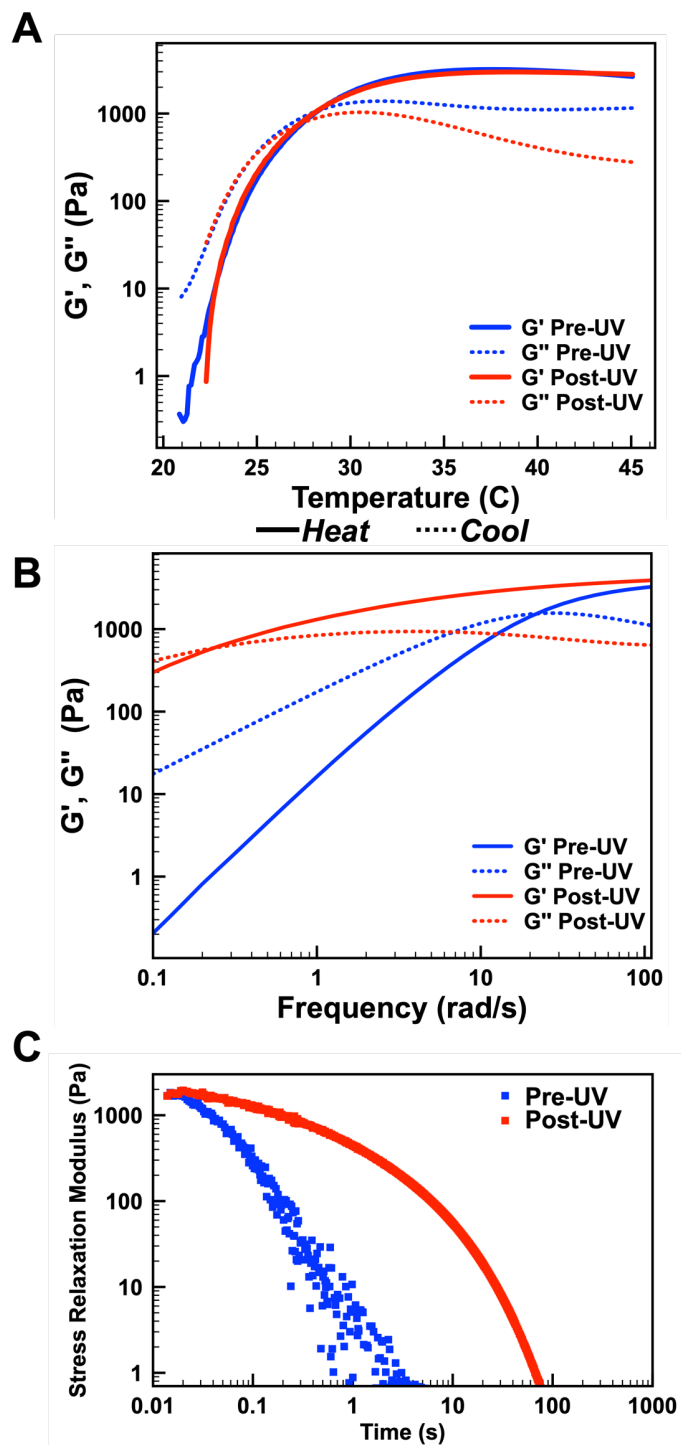

**Figure S8:** Comparative analysis of the rheological behavior of F127-BM:CB[8] hydrogels both before and after UV treatment to induce BM photo-dimerization, including (A) Temperature-dependent measurements, (B) Frequency Sweeps, and (C) Stress relaxation time-course studies.

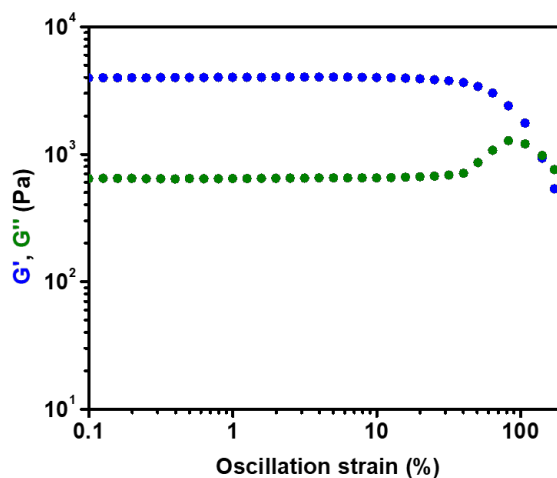

**Figure S9:** Strain sweep measurements of the gel formed by mixing F127-BM with 1 eq. CB[8] and irradiated for 6 h using 365 nm light, with measurements taken at 37 °C from 0.1% to 200% at 100 rad/s frequency to demonstrate the linear viscoelastic region.
